# Supplementary material
Source: Springer Nature journal article supplement (https://www.springermedizin.de/resource/supplementary/12931_2013_1501_MOESM5_ESM.pdf/9426338)

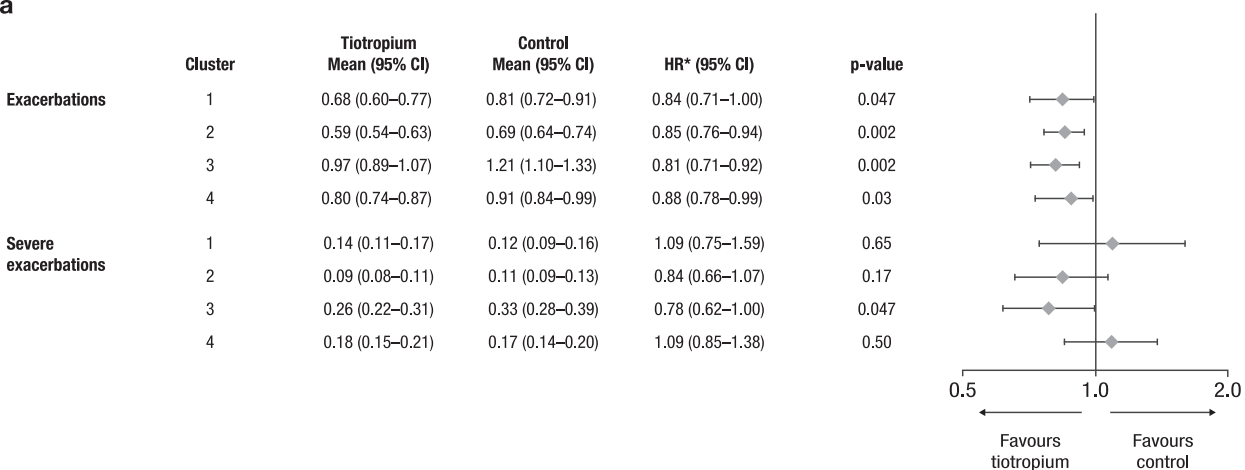

**b**

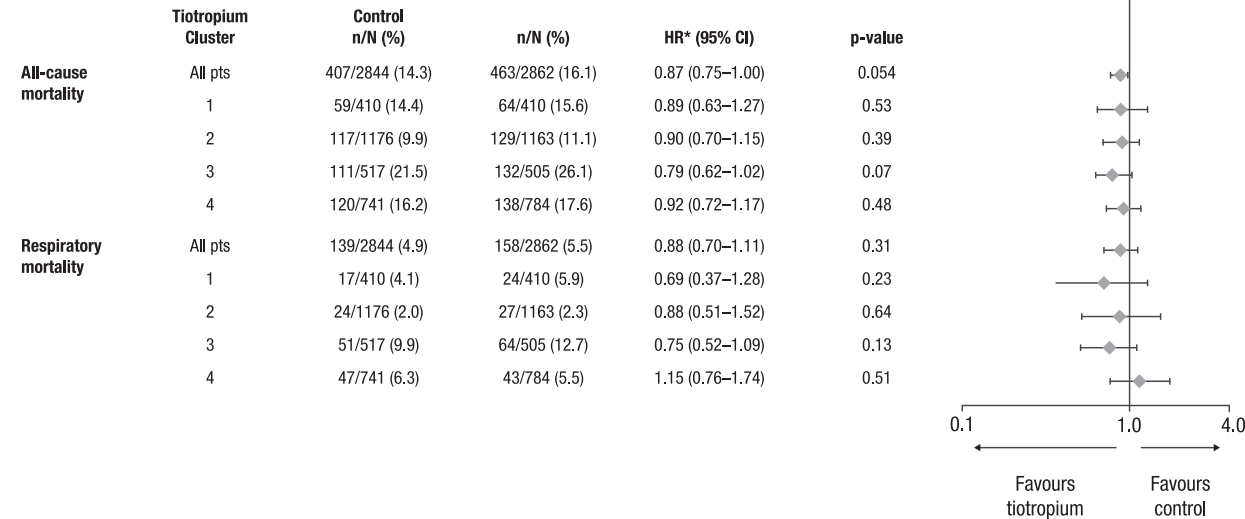

Supplement: MOESM5 [file 9426338]
